# Supplementary figures and images for: Impact of Transfused Citrate on Pathophysiology in Massive Transfusion
Source: PubMed Central journal article supplement — Crit Care Explor. 2023 May 31;5(6):e0925. doi: 10.1097/CCE.0000000000000925 (PMC10234463; doi:10.1097/cce.0000000000000925), 2023-05-31

**Lag time**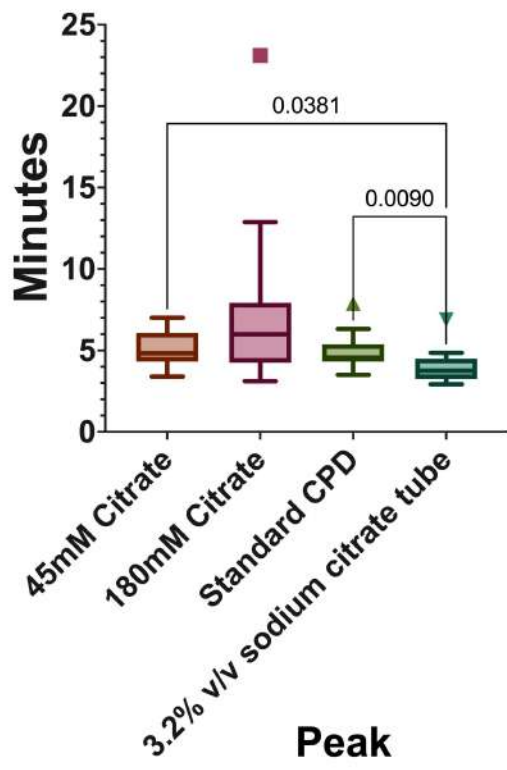**ETP**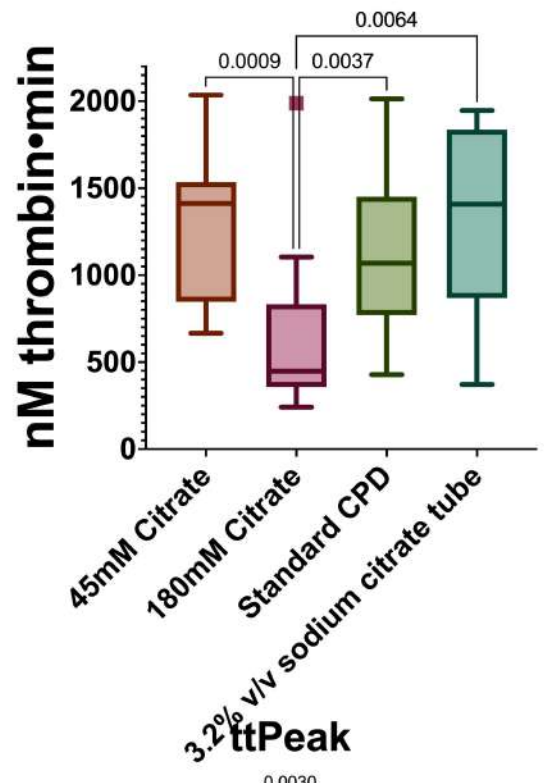**Peak**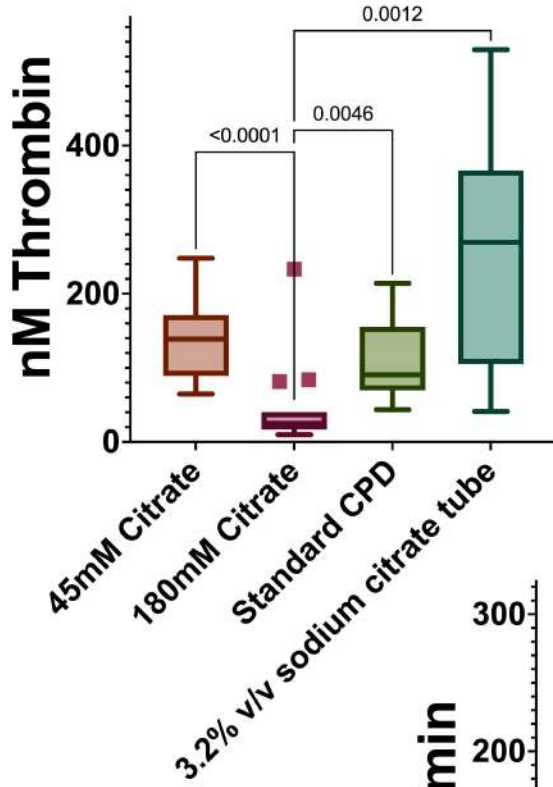**ttPeak**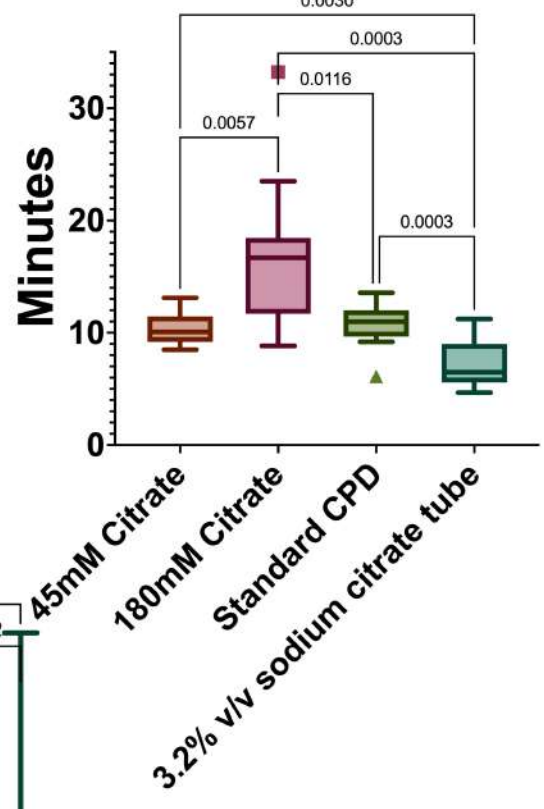**Velocity**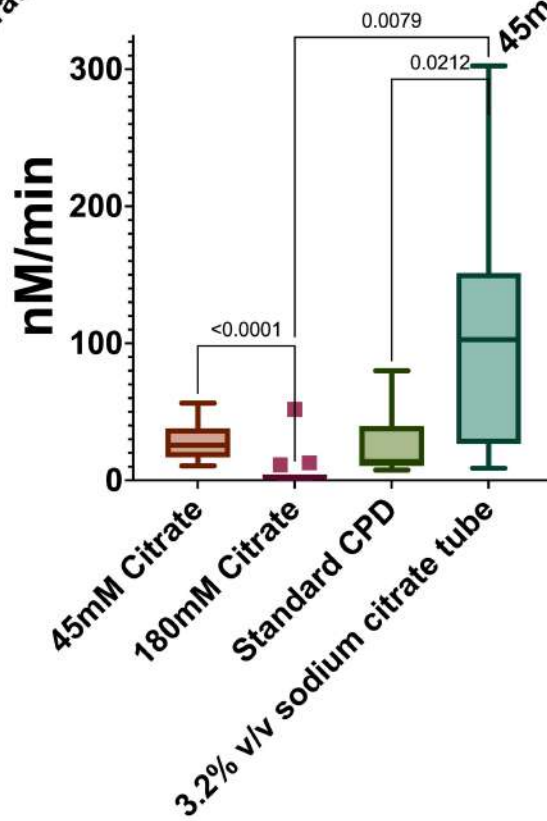

Supplement: cc9-5-e0925-s001.pdf [file cc9-5-e0925-s001.pdf]
